# Supplementary material
Source: publisher site journal article supplement (https://www.dovepress.com/article/257459)
Supplement: Supplementary file 1 [file get_supplementary_file.php]

## Supporting Information

### Transferrin receptor-targeted PEG-PLA Polymeric Micelles for Chemotherapy against Glioblastoma multiforme

Ping Sun<sup>1,2</sup>, Ph.D., Yue Xiao<sup>1</sup>, Ph.D., Qianqian Di<sup>1</sup>, Ph.D., Wenjing Ma<sup>1</sup>, M.S., Xingyu Ma<sup>1</sup>, M.S., Qingqing Wang<sup>3</sup>, Ph.D., Weilin Chen<sup>1</sup>, Ph.D.

<sup>1</sup>Guangdong Provincial Key Laboratory of Regional Immunity and Diseases, Department of Immunology, Shenzhen University School of Medicine, Shenzhen, 518060 China

<sup>2</sup>Key Laboratory for Biomedical Measurements and Ultrasound Imaging, School of Biomedical Engineering, Shenzhen University Health Science Center, Shenzhen 518060, China

<sup>3</sup>Institute of Immunology, Zhejiang University of Medicine School, Hangzhou, Zhejiang, 310058, China

E-mail: [cwl@szu.edu.cn](mailto:cwl@szu.edu.cn). (W.Chen)

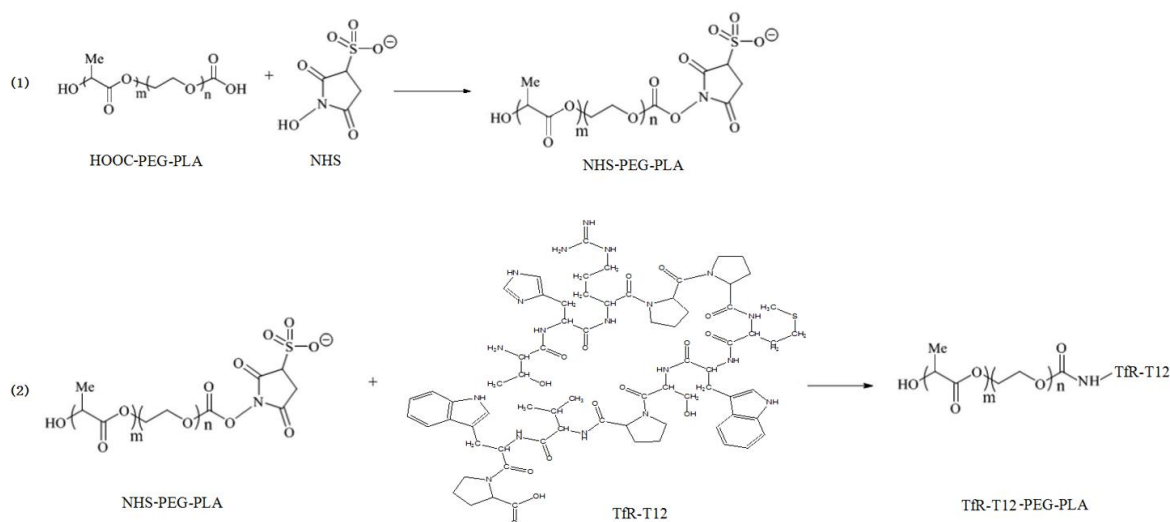

Figure S1: The synthetic route of TfR-T12-PEG-PLA copolymer, EDC/NHS was used to activator for reaction 24h.

**Abbreviations:** EDC, 1-(3-Dimethylaminopropyl)-3-ethylcarbodiimide-2-hydrochloride; NHS, N-Hydroxysuccinimide.

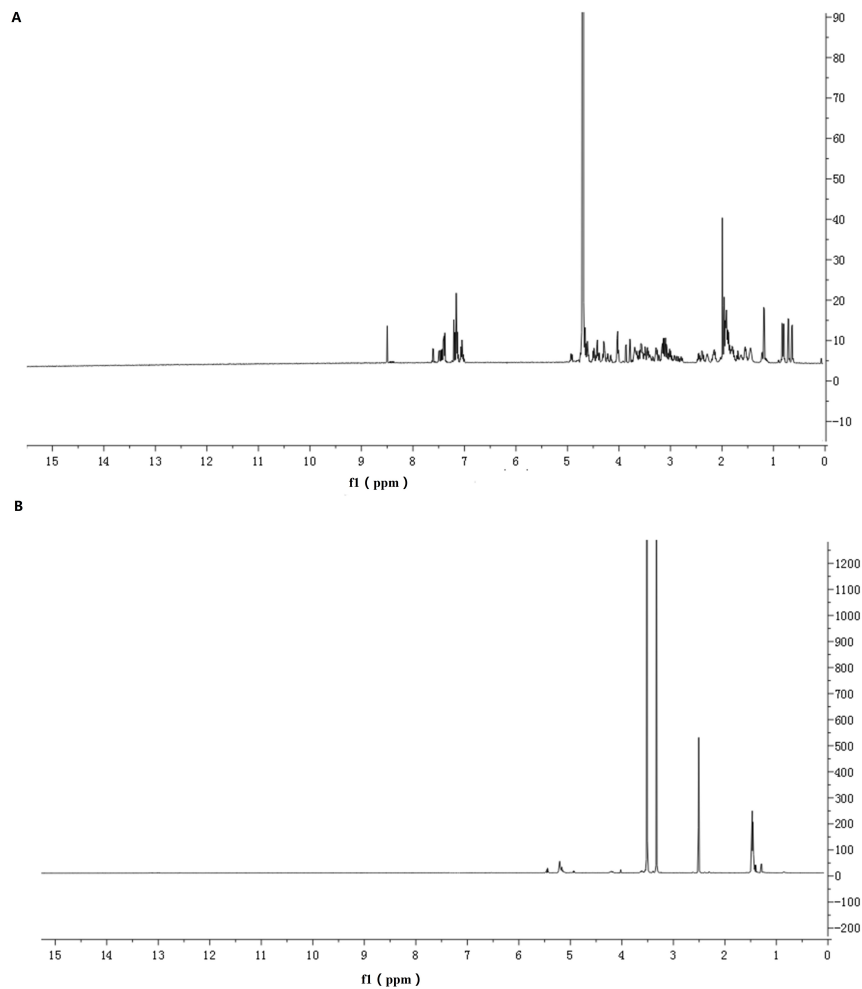

Figure S2:  $^1\text{H-NMR}$  spectroscopy of TfR-T12 peptide (A) and PEG-PLA (B).  
Abbreviations: TfR-T12, Transferrin Receptor-T12 peptide; PEG-PLA, Poly(ethylene glycol)-b-poly(L-lactide-co-glycolide).

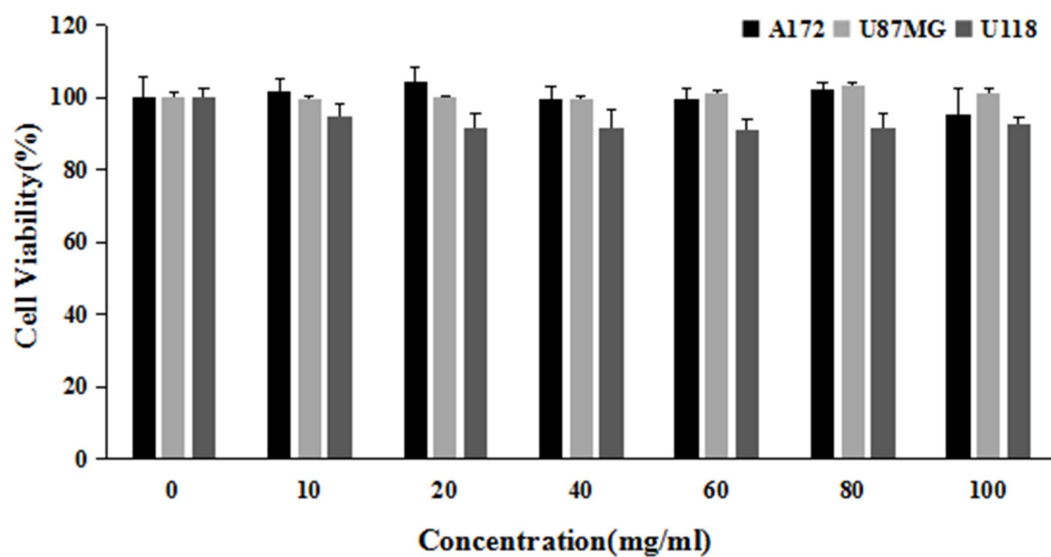

Figure S3: Toxicity evaluation of TfR-T12-PEG-PLA copolymer within 0-100mg/ml concentration in A172, U87MG and U118 cells, the cell viability was above 90% in every group.

**Abbreviations:** TfR-T12, Transferrin Receptor-T12 peptide.

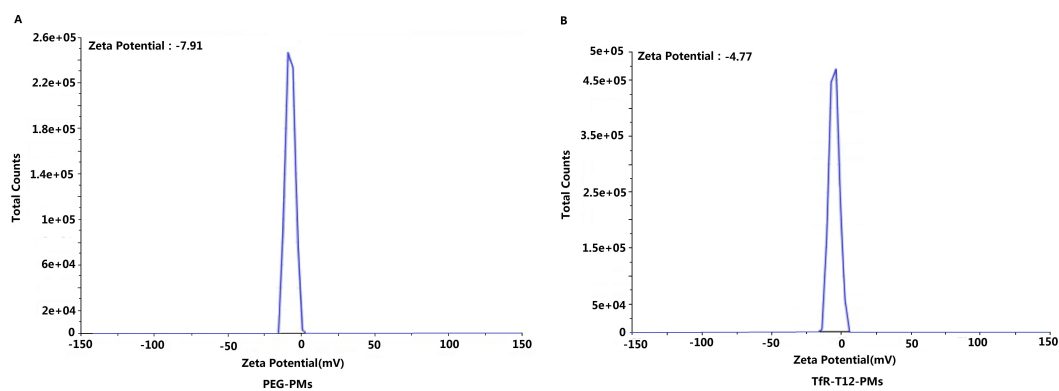

Figure S4: The zeta potential distribution of PEG-PMs (A) and TfR-T12-PMs (B).

**Abbreviations:** PEG-PLA/PTX Polymer Micelles; TfR-T12-PMs, TfR-T12-PEG-PLA/PTX Polymer Micelles.

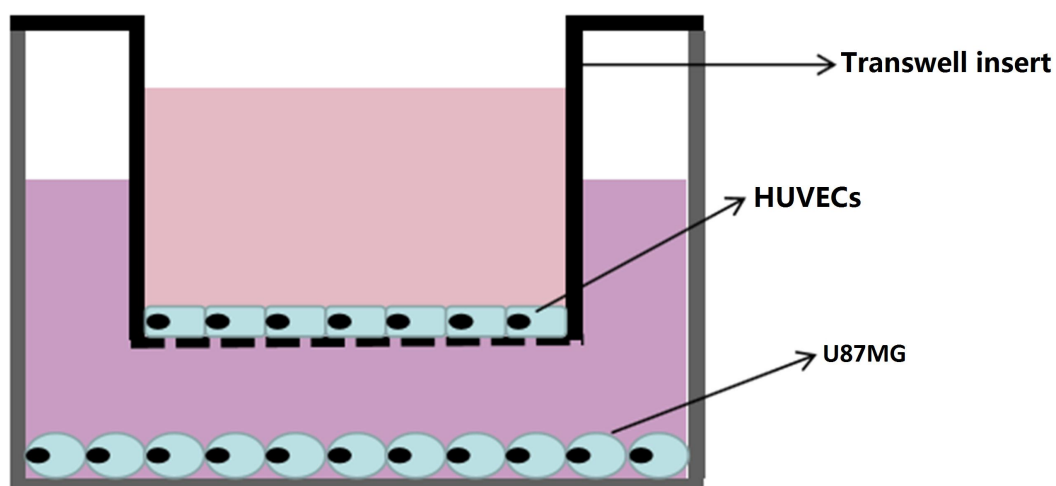

Figure S5: Schematic of the *in vitro* BBB/BBTB model, which is formed by HUVECs /U87MG cells co-culture over the transwell insert for 3days.

**Abbreviations:** BBB, Blood–Brain Barrier; BBTB, Blood–Brain Tumor Barrier

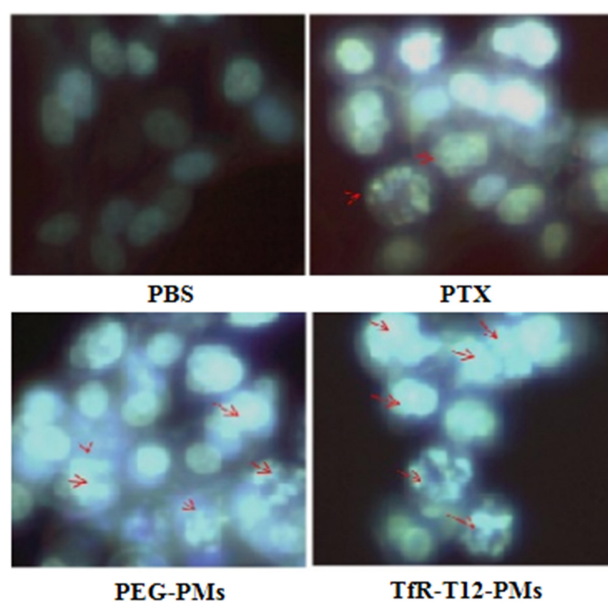

Figure S6: The hoechst staining observation of U87MG cells treated with different PTX formulations after HUVEC/U87MG co-culture, PBS was as control group, and the red arrow represents U87MG apoptosis.

**Abbreviations:** PTX, Paclitaxel; PEG-PMs, PEG-PLA/PTX Polymer Micelles; TfR-T12-PMs, TfR-T12-PEG-PLA/PTX Polymer Micelles.

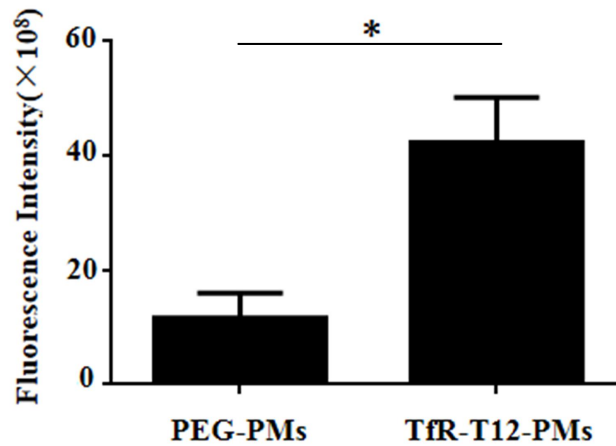

Figure S7: Fluorescence distribution of brain tissue in health mice, DiR was loaded in PEG-PMs and TfR-T12-PMs in this study, data are depicted as means  $\pm$  SD, n = 3, \*P < 0.05.

**Abbreviations:** PEG-PMs, PEG-PLA/PTX Polymer Micelles; TfR-T12-PMs, TfR-T12-PEG-PLA/PTX Polymer Micelles.

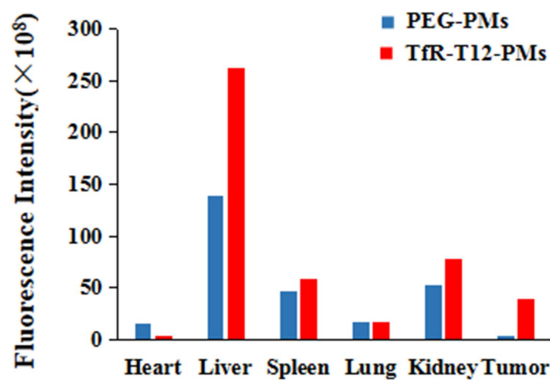

Figure S8: Fluorescence distribution of heart, liver, spleen, lung, kidney and tumor in subcutaneous tumor model, n = 3.

**Abbreviations:** PEG-PMs, PEG-PLA/PTX Polymer Micelles; TfR-T12-PMs, TfR-T12-PEG-PLA/PTX Polymer Micelles.

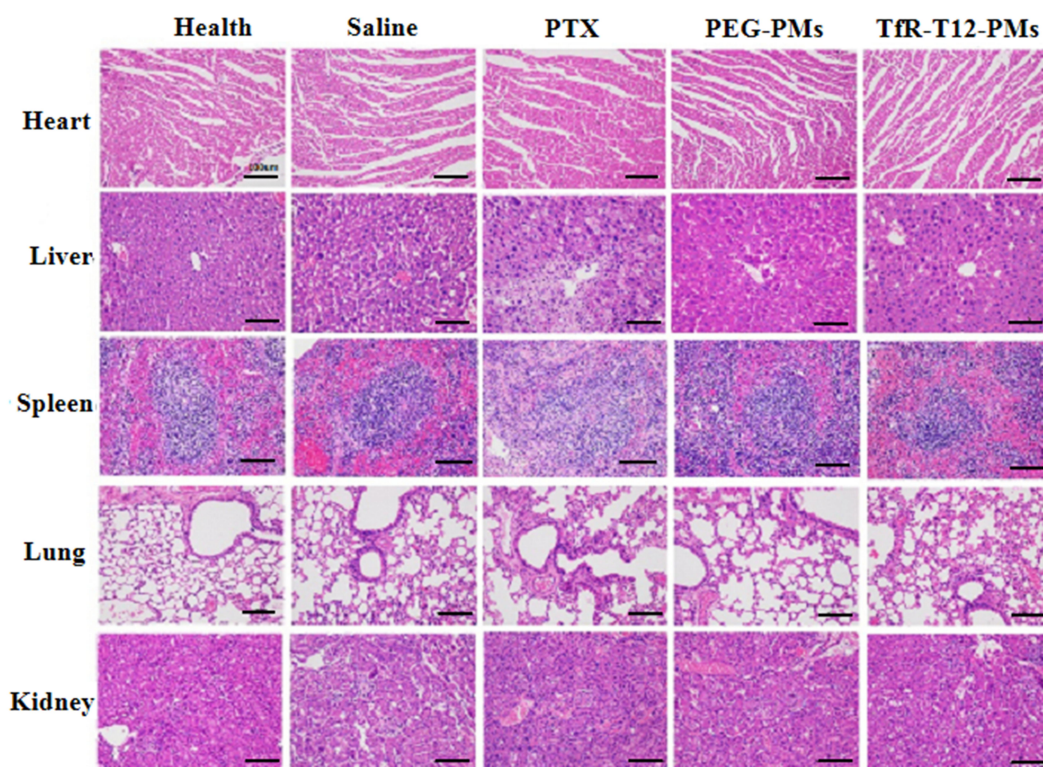

Figure S9: H&E stained for heart, liver, spleen, lung and kidney sections of U87MG subcutaneous bearing mice treated with saline, PTX, PEG-PMs and TfR-T12-PMs. Health mice were taken as control; scale bar =100 $\mu$ m.

**Abbreviations:** H&E, Hematoxylin and Eosin; PTX, Paclitaxel; PEG-PMs, PEG-PLA/PTX Polymer Micelles; TfR-T12-PMs, TfR-T12-PEG-PLA/PTX Polymer Micelles.

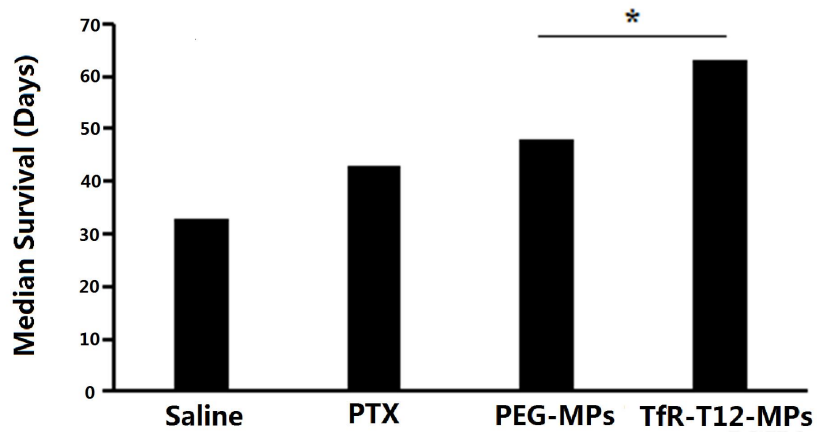

Figure S10: Median survival of orthotopic U87MG bearing mice treated with saline, PTX, PEG-PMs and TfR-T12-PMs, n=7, \*P < 0.05.

**Abbreviations:** PTX, Paclitaxel; PEG-PMs, PEG-PLA/PTX Polymer Micelles; TfR-T12-PMs, TfR-T12-PEG-PLA/PTX Polymer Micelles.
